# Supplementary material for: Comparative Genome Analysis of 33 Chlamydia Strains Reveals Characteristic Features of Chlamydia Psittaci and Closely Related Species
Source: MDPI journal article supplement (doi:10.3390/pathogens9110899), 2020-10-28

No. of common CDS

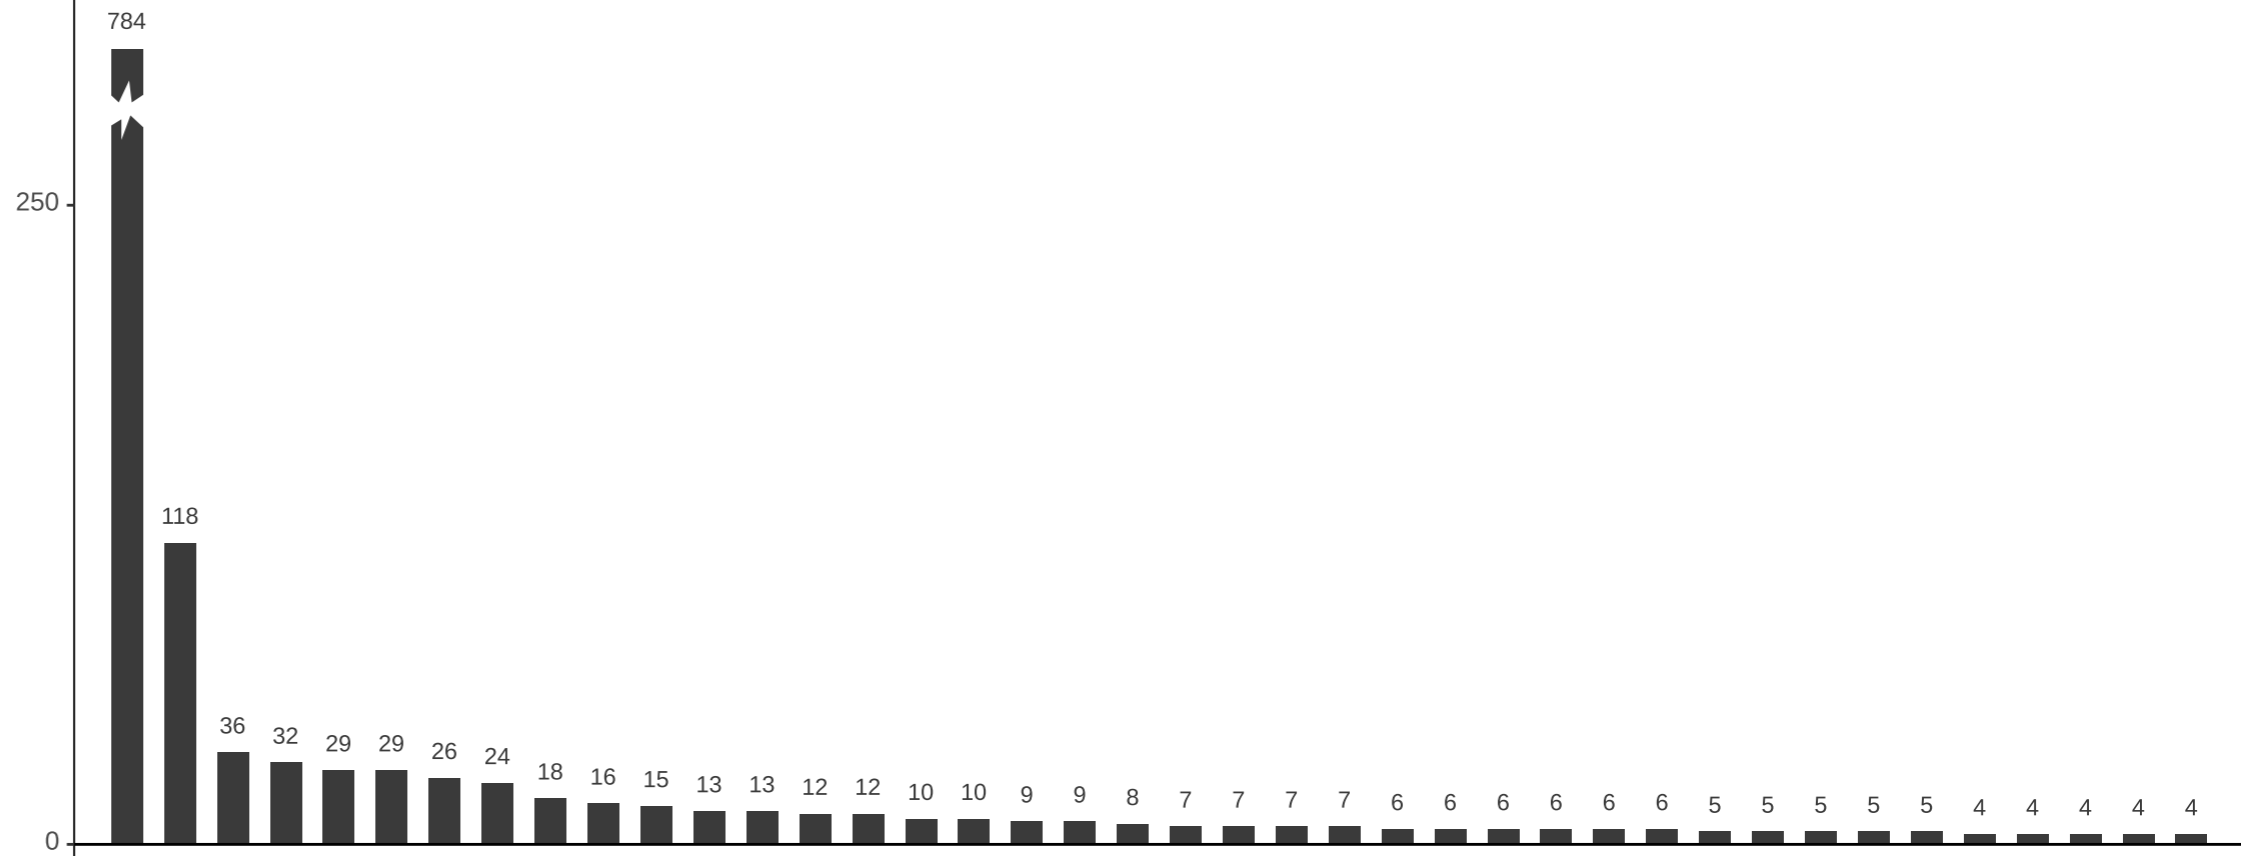

- Cmu\_Nigg
- Ctr\_434-Bu
- Ctr\_D-UW-3-CX
- Csu\_1-25a
- Cga\_14DC100
- Cga\_13DC099
- Cav\_11DC096
- Ctr\_A-HAR-13
- Cga\_14DC101
- Cga\_08-1274-3
- Cav\_12DC097
- Cga\_12-4358
- Cav\_14DC103
- Cga\_JX-1
- Cpe\_E58
- Cav\_10DC88
- Cib\_10-1398-6
- Cfe\_Fe-C56
- Cps\_6BC
- Cca\_GPIC
- Cps\_NJ1
- Cps\_02DC15
- Cab\_16DC122
- Cps\_GR9
- Cps\_WS-RT-E30
- Cps\_08DC60
- Cps\_MN
- Cab\_S26-3
- Cps\_Mat116
- Cab\_C18-98
- Cpn\_TW-183
- Cps\_VS225
- Cps\_CP3

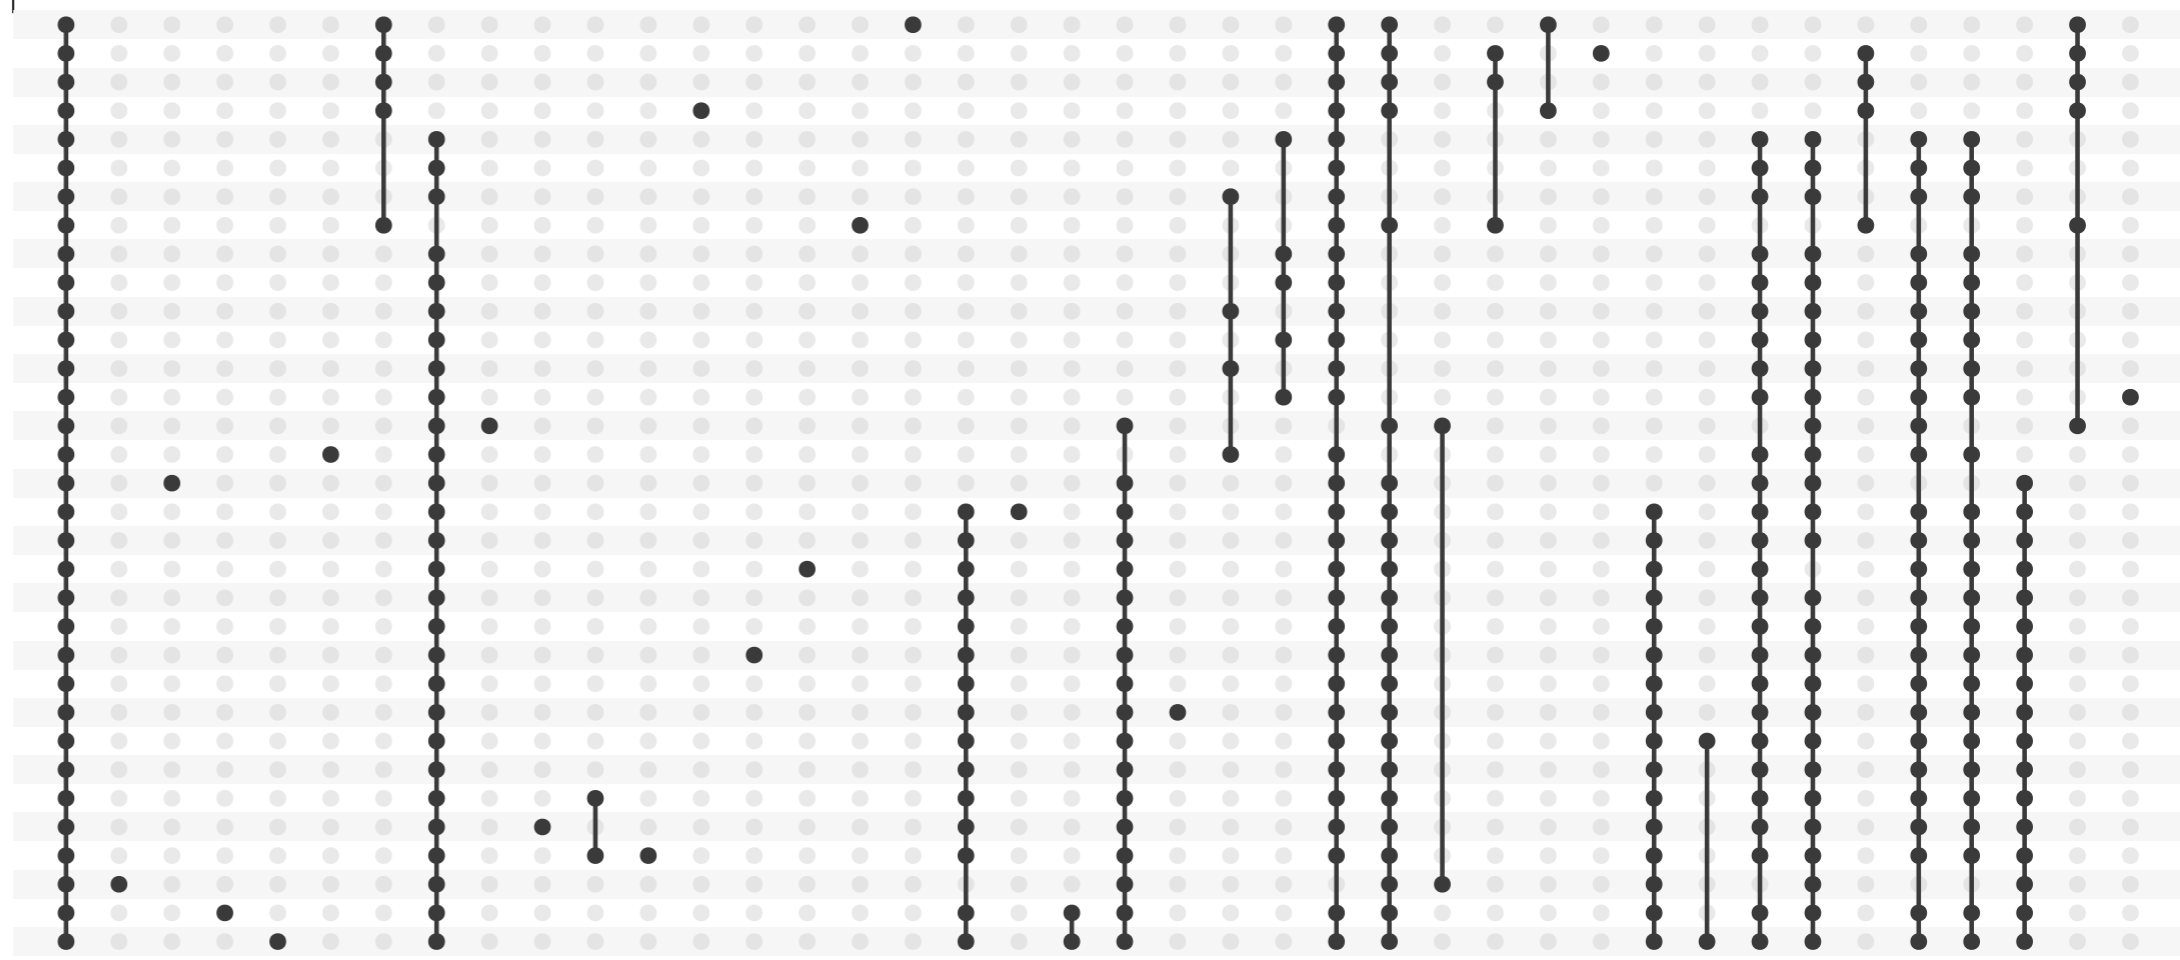

No. of identified CDS

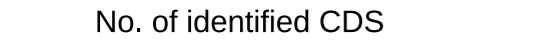

Supplement: s1 [file s1]
