# Supplementary figures and images for: Comparative Genome Analysis of 33 Chlamydia Strains Reveals Characteristic Features of Chlamydia Psittaci and Closely Related Species
Source: MDPI journal article supplement (doi:10.3390/pathogens9110899), 2020-10-28

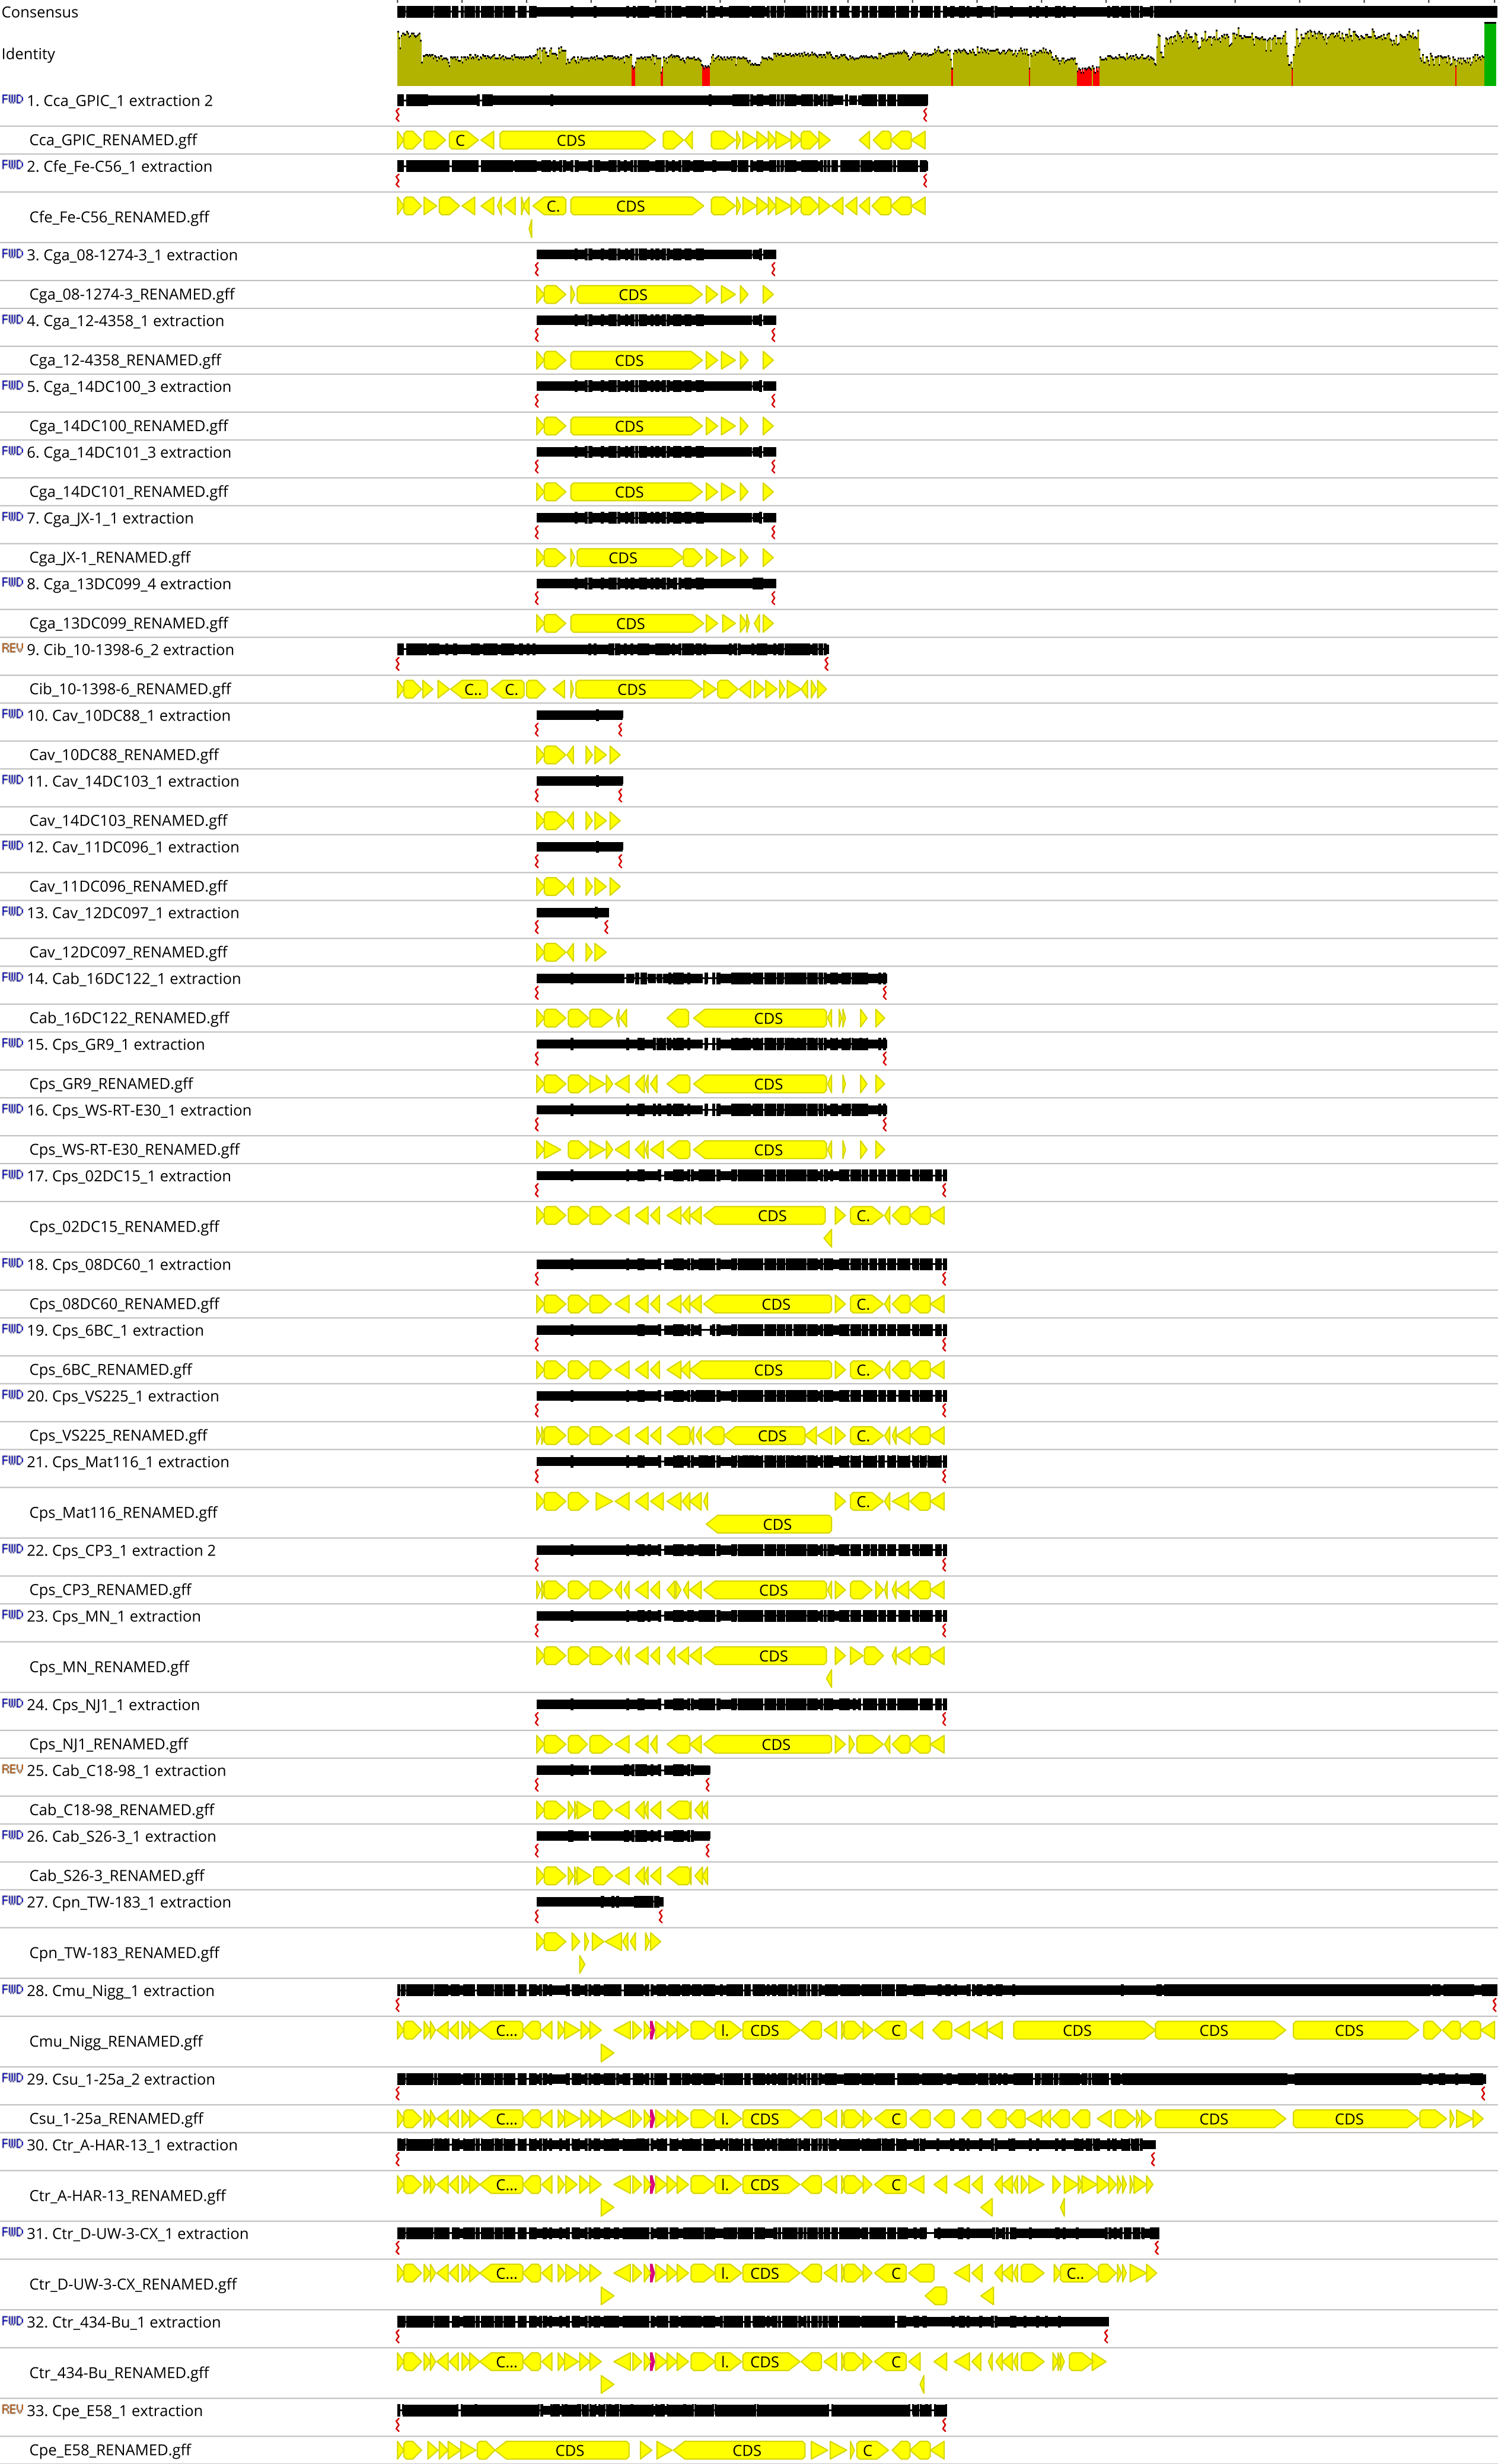

Supplement: s1 [file s1]
